# Supplementary material for: Active subseafloor microbial communities from Mariana back-arc venting fluids share metabolic strategies across different thermal niches and taxa
Source: Springer Nature journal article supplement (doi:10.1038/s41396-019-0431-y), 2019-05-09
Supplement: MOESM12 [file 41396_2019_431_MOESM12_ESM.xlsx]

## Sheet: ST4-MetaGAssm
Supplemental Table 4: Sequencing and assembly statistics for in situ metagenomes and RNA-SIP metatranscriptomes.
	Illium	Alice Springs	Burke	Hafa Adai (VC-1)	Hafa Adai (Alba)	Hafa Adai (VC-2)	Perserverance (Limpet Canyon)	Perseverance Plume	Illium 13C-18hr-55	Burke 13C-18hr-55	Hafa Adai (Alba) 13C-18hr-55	Hafa Adai (VC-2) 13C-18h-80	Hafa Adai (VC-2) 13C-18hr-55	Hafa Adai (VC-2) 13C-9hr-80
IMG Genome ID	3300021792	3300021973	3300021980	3300021977	3300021979	3300021975	3300021974	3300021978	3300022233	3300022207	3300022236	3300022234	3300022210	3300022228
Total Read Pairs	95992625	51544952	168123224	105661386	78063306	155579030	55957722	79614866	42508300	125823734	43573739	23378075	36430995	52877876
Filtered Read Pairs	88428436	48159348	154968414	99308654	74337294	145581808	51506408	73637662	41884874	118838439	41588313	22443627	34802597	50649461
% quality read pairs	92.12	93.4317	92.1755	93.9877	95.2269	93.5742	92.0452	92.4924	98.5334	94.4483	95.4435	96.0029	95.5302	95.7857
Assembler	IDBA_150kmer	IDBA_150kmer	IDBA_150kmer	IDBA_150kmer	IDBA_150kmer	IDBA_150kmer	IDBA_150kmer	IDBA_150kmer	IDBA_150kmer	IDBA_150kmer	IDBA_150kmer	IDBA_150kmer	IDBA_150kmer	IDBA_150kmer
# contigs (>= 0 bp)	1497377	469991	1391827	863576	809643	633635	720084	727155	1377	1953	2193	715	4152	2414
# contigs (>= 1000 bp)	253782	44453	176011	120787	120867	78565	77994	96608	306	88	526	294	1195	648
# contigs (>= 5000 bp)	11415	1879	6055	4354	4849	2372	1929	6269	4	0	22	122	101	146
# contigs (>= 10000 bp)	2953	421	1010	745	1068	442	203	1937	0	0	4	43	10	47
# contigs (>= 25000 bp)	337	26	85	47	110	26	3	403	0	0	1	2	0	4
# contigs (>= 50000 bp)	53	1	17	7	19	0	0	129	0	0	0	0	0	0
Total length (>= 0 bp)	1193723205	302006861	975483239	624250243	607237338	436941827	473228990	556063065	1111933	842381	1903231	1861463	4349763	3281490
Total length (>= 1000 bp)	509876480	86744559	332163765	232742686	241998444	146677357	140618074	228669293	552552	139838	1138825	1700358	2879453	2482112
Total length (>= 5000 bp)	107731542	15986864	49327209	35297890	43886055	19204008	13790106	70821414	28127	0	195474	1256287	712636	1418703
Total length (>= 10000 bp)	50751042	6309360	16065400	11570329	18704225	6599125	2646400	41726678	0	0	66847	675985	131287	703534
Total length (>= 25000 bp)	13264490	870491	3361779	1899782	5371303	837454	103933	19579006	0	0	30049	58648	0	117688
Total length (>= 50000 bp)	4043417	54695	1183665	566524	2348080	0	0	10385597	0	0	0	0	0	0
# contigs	895315	208256	733068	453133	436615	322587	353154	364288	813	483	1140	385	2496	1279
Largest contig	199905	54695	143918	182667	457165	48677	40971	437490	8470	4106	30049	32724	18700	34979
Total length	944372191	193996100	701856868	454112962	452882736	308265272	321506215	406205308	900116	398498	1555402	1762178	3770618	2917004
GC (%)	41.87	46.36	41.38	41.69	39.96	39.59	37.88	52.39	43.59	45.53	57.04	30.46	39.74	40.88
N50	1081	900	950	1025	1075	954	889	1172	1227	765	1681	8064	2022	4731
N75	704	631	652	672	686	651	631	695	772	619	949	4476	1041	1678
L50	217488	55277	195274	115170	105848	86202	99398	72899	215	158	249	67	488	155
L75	493211	120922	422440	254798	240728	185996	208713	189294	446	303	555	136	1145	415
# N's per 100 kbp	0	0	0	0	0	0	0	0	0	0	0	0	0	0
RNA genes (% of assembled)	0.73	0.77	0.77	0.8	0.87	0.77	0.71	0.74	6.67	55.89	23.09	11.18	10.92	18.13
